# Supplementary material
Source: PubMed Central journal article supplement (PMC5568092)
Supplement: NIHMS895029-supplement-4.pdf [file NIHMS895029-supplement-4.pdf]

Supplemental Table 4. DOB alleles. Related to Figures 6 and 7.

| Chrom | Position | RSID        | Ref | Alt | Protein Consequence | Transcript Consequence | Annotation  | Number of Homozygotes | Allele Frequency |
|-------|----------|-------------|-----|-----|---------------------|------------------------|-------------|-----------------------|------------------|
| 6     | 32782883 | .           | G   | A   | p.Ala100Val         | c.299C>T               | missense    | 0                     | 0.00002472       |
| 6     | 32782931 | .           | G   | A   | p.Ala84Val          | c.251C>T               | missense    | 0                     | 0.000008237      |
| 6     | 32782827 | .           | T   | C   | p.Arg119Gly         | c.355A>G               | missense    | 0                     | 0.00001656       |
| 6     | 32782826 | rs143319753 | C   | T   | p.Arg119Lys         | c.356G>A               | missense    | 0                     | 0.001093         |
| 6     | 32782246 | .           | C   | A   | p.Arg165Ile         | c.494G>T               | missense    | 0                     | 0.000008579      |
| 6     | 32784676 | rs2071554   | C   | T   | p.Arg18Gln          | c.53G>A                | missense    | 343                   | 0.06776          |
| 6     | 32781586 | .           | C   | T   | p.Arg223Lys         | c.668G>A               | missense    | 0                     | 0.00003937       |
| 6     | 32782989 | rs147835586 | G   | A   | p.Arg65Cys          | c.193C>T               | missense    | 0                     | 0.00002471       |
| 6     | 32782988 | rs144504518 | C   | T   | p.Arg65His          | c.194G>A               | missense    | 0                     | 0.00003295       |
| 6     | 32782913 | .           | C   | T   | p.Arg90Gln          | c.269G>A               | missense    | 0                     | 0.000008238      |
| 6     | 32782913 | .           | C   | A   | p.Arg90Leu          | c.269G>T               | missense    | 0                     | 0.000008238      |
| 6     | 32782914 | .           | G   | A   | p.Arg90Trp          | c.268C>T               | missense    | 0                     | 0.00001648       |
| 6     | 32782896 | .           | T   | C   | p.Arg96Gly          | c.286A>G               | missense    | 0                     | 0.00004119       |
| 6     | 32782325 | rs139684832 | T   | G   | p.Asn139His         | c.415A>C               | missense    | 0                     | 0.000008605      |
| 6     | 32782213 | .           | T   | C   | p.Asn176Ser         | c.527A>G               | missense    | 0                     | 0.0001543        |
| 6     | 32781221 | rs143706496 | T   | C   | p.Asn261Ser         | c.782A>G               | missense    | 0                     | 0.00000859       |
| 6     | 32782877 | .           | T   | A   | p.Asp102Val         | c.305A>T               | missense    | 0                     | 0.00001648       |
| 6     | 32782285 | .           | T   | A   | p.Asp152Val         | c.455A>T               | missense    | 0                     | 0.00005158       |
| 6     | 32784646 | .           | T   | C   | p.Asp28Gly          | c.83A>G                | missense    | 0                     | 0.000008614      |
| 6     | 32782983 | .           | C   | T   | p.Asp67Asn          | c.199G>A               | missense    | 0                     | 0.000008237      |
| 6     | 32782935 | .           | C   | A   | p.Asp83Tyr          | c.247G>T               | missense    | 0                     | 0.000008237      |
| 6     | 32780998 | .           | A   | G   | p.Cys273Arg         | c.817T>C               | missense    | 0                     | 0.000008601      |
| 6     | 32782376 | .           | G   | A   | p.Gln122Ter         | c.364C>T               | stop gained | 0                     | 0.000008656      |
| 6     | 32782330 | .           | T   | C   | p.Gln137Arg         | c.410A>G               | missense    | 0                     | 0.000008606      |
| 6     | 32782255 | .           | T   | C   | p.Gln162Arg         | c.485A>G               | missense    | 0                     | 0.000008583      |
| 6     | 32781234 | .           | G   | C   | p.Gln257Glu         | c.769C>G               | missense    | 0                     | 0.000008592      |
| 6     | 32784655 | .           | T   | C   | p.Gln25Arg          | c.74A>G                | missense    | 0                     | 0.000008611      |
| 6     | 32782924 | .           | C   | A   | p.Gln86His          | c.258G>T               | missense    | 0                     | 0.000008237      |
| 6     | 32782926 | rs142229094 | G   | T   | p.Gln86Lys          | c.256C>A               | missense    | 0                     | 0.0005437        |
| 6     | 32782885 | .           | C   | A   | p.Gln99His          | c.297G>T               | missense    | 0                     | 0.000008239      |
| 6     | 32782887 | .           | G   | A   | p.Gln99Ter          | c.295C>T               | stop gained | 0                     | 0.00001648       |
| 6     | 32782251 | .           | C   | A   | p.Glu163Asp         | c.489G>T               | missense    | 0                     | 0.00002574       |
| 6     | 32782250 | rs142148406 | C   | G   | p.Glu164Gln         | c.490G>C               | missense    | 0                     | 0.0001201        |
| 6     | 32782102 | .           | T   | C   | p.Glu213Gly         | c.638A>G               | missense    | 0                     | 0.000008624      |
| 6     | 32781219 | .           | C   | T   | p.Glu262Lys         | c.784G>A               | missense    | 0                     | 0.00004295       |
| 6     | 32783001 | .           | C   | T   | p.Glu61Lys          | c.181G>A               | missense    | 0                     | 0.000008237      |
| 6     | 32782929 | .           | C   | T   | p.Glu85Lys          | c.253G>A               | missense    | 0                     | 0.000008238      |
| 6     | 32782874 | rs144814623 | C   | A   | p.Gly103Val         | c.308G>T               | missense    | 1                     | 0.0003791        |
| 6     | 32782224 | .           | GC  | G   | p.Gly172AlafsTer14  | c.515delG              | frameshift  | 0                     | 0.0004802        |

|   |          |             |     |   |                    |                |             |     |            |
|---|----------|-------------|-----|---|--------------------|----------------|-------------|-----|------------|
| 6 | 32781500 | .           | C   | T | p.Gly252Arg        | c.754G>A       | missense    | 0   | 0.0004295  |
| 6 | 32783046 | .           | C   | T | p.Gly46Arg         | c.136G>A       | missense    | 0   | 0.00005767 |
| 6 | 32783045 | .           | C   | T | p.Gly46Glu         | c.137G>A       | missense    | 0   | 0.00008238 |
| 6 | 32782863 | .           | G   | T | p.His107Asn        | c.319C>A       | missense    | 0   | 0.00008243 |
| 6 | 32782334 | .           | G   | A | p.His136Tyr        | c.406C>T       | missense    | 0   | 0.00008608 |
| 6 | 32782316 | .           | G   | A | p.His142Tyr        | c.424C>T       | missense    | 0   | 0.00008603 |
| 6 | 32782276 | .           | A   | G | p.Ile155Thr        | c.464T>C       | missense    | 0   | 0.00008593 |
| 6 | 32782220 | .           | T   | A | p.Ile174Phe        | c.520A>T       | missense    | 0   | 0.00001715 |
| 6 | 32782219 | .           | A   | G | p.Ile174Thr        | c.521T>C       | missense    | 0   | 0.0000343  |
| 6 | 32782336 | .           | A   | G | p.Leu135Pro        | c.404T>C       | missense    | 0   | 0.0001549  |
| 6 | 32782318 | .           | A   | G | p.Leu141Pro        | c.422T>C       | missense    | 0   | 0.00001721 |
| 6 | 32782142 | .           | G   | T | p.Leu200Ile        | c.598C>A       | missense    | 0   | 0.00008589 |
| 6 | 32781554 | rs2070121   | G   | T | p.Leu234Ile        | c.700C>A       | missense    | 0   | 0.0009835  |
| 6 | 32781554 | rs2070121   | G   | A | p.Leu234Phe        | c.700C>T       | missense    | 143 | 0.114      |
| 6 | 32782904 | .           | A   | T | p.Leu93His         | c.278T>A       | missense    | 0   | 0.00008238 |
| 6 | 32782279 | .           | T   | C | p.Lys154Arg        | c.461A>G       | missense    | 0   | 0.00008594 |
| 6 | 32784728 | .           | T   | C | p.Met1?            | c.1A>G         | start lost  | 0   | 0.00001729 |
| 6 | 32782182 | .           | C   | A | p.Met186Ile        | c.558G>T       | missense    | 0   | 0.00001715 |
| 6 | 32782182 | .           | C   | T | p.Met186Ile        | c.558G>A       | missense    | 0   | 0.00001715 |
| 6 | 32782183 | .           | A   | G | p.Met186Thr        | c.557T>C       | missense    | 0   | 0.00008573 |
| 6 | 32782173 | .           | C   | T | p.Met189Ile        | c.567G>A       | missense    | 0   | 0.00008576 |
| 6 | 32784662 | .           | T   | C | p.Met23Val         | c.67A>G        | missense    | 0   | 0.00002583 |
| 6 | 32782298 | .           | A   | T | p.Phe148Ile        | c.442T>A       | missense    | 0   | 0.0000086  |
| 6 | 32783028 | .           | A   | G | p.Phe52Leu         | c.154T>C       | missense    | 0   | 0.00008237 |
| 6 | 32782355 | .           | G   | A | p.Pro129Ser        | c.385C>T       | missense    | 0   | 0.00003448 |
| 6 | 32784710 | .           | G   | C | p.Pro7Ala          | c.19C>G        | missense    | 0   | 0.00001724 |
| 6 | 32784664 | .           | G   | A | p.Ser22Phe         | c.65C>T        | missense    | 0   | 0.00006027 |
| 6 | 32781227 | .           | G   | C | p.Ser259Cys        | c.776C>G       | missense    | 0   | 0.0000859  |
| 6 | 32782836 | .           | T   | C | p.Thr116Ala        | c.346A>G       | missense    | 0   | 0.00008267 |
| 6 | 32782304 | .           | T   | A | p.Thr146Ser        | c.436A>T       | missense    | 0   | 0.00008601 |
| 6 | 32784679 | .           | G   | A | p.Thr17Ile         | c.50C>T        | missense    | 0   | 0.00001722 |
| 6 | 32782146 | .           | GGT | G | p.Thr198LeufsTer21 | c.592_593delAC | frameshift  | 0   | 0.00008587 |
| 6 | 32781236 | .           | G   | T | p.Thr256Lys        | c.767C>A       | missense    | 0   | 0.00008593 |
| 6 | 32781236 | .           | G   | A | p.Thr256Met        | c.767C>T       | missense    | 0   | 0.00001719 |
| 6 | 32782270 | rs146350950 | C   | A | p.Trp157Leu        | c.470G>T       | missense    | 0   | 0.00006872 |
| 6 | 32782270 | rs146350950 | C   | T | p.Trp157Ter        | c.470G>A       | stop gained | 0   | 0.0000859  |
| 6 | 32781588 | .           | C   | T | p.Trp222Ter        | c.666G>A       | stop gained | 0   | 0.00003966 |
| 6 | 32782922 | .           | C   | A | p.Trp87Leu         | c.260G>T       | missense    | 0   | 0.00008237 |
| 6 | 32784707 | .           | A   | G | p.Trp8Arg          | c.22T>C        | missense    | 0   | 0.00008619 |
| 6 | 32782295 | .           | A   | G | p.Tyr149His        | c.445T>C       | missense    | 0   | 0.0000344  |
| 6 | 32782832 | .           | A   | G | p.Val117Ala        | c.350T>C       | missense    | 0   | 0.00008273 |
| 6 | 32782832 | .           | A   | C | p.Val117Gly        | c.350T>G       | missense    | 0   | 0.00008273 |
| 6 | 32782833 | .           | C   | G | p.Val117Leu        | c.349G>C       | missense    | 0   | 0.00002481 |
| 6 | 32782367 | .           | C   | T | p.Val125Met        | c.373G>A       | missense    | 0   | 0.00008634 |

|   |          |             |   |   |             |            |                 |    |            |
|---|----------|-------------|---|---|-------------|------------|-----------------|----|------------|
| 6 | 32782189 | .           | A | G | p.Val184Ala | c.551T>C   | missense        | 0  | 0.00008573 |
| 6 | 32782186 | .           | A | G | p.Val185Ala | c.554T>C   | missense        | 0  | 0.00008573 |
| 6 | 32782153 | .           | A | T | p.Val196Asp | c.587T>A   | missense        | 0  | 0.00008581 |
| 6 | 32782112 | rs150697393 | C | T | p.Val210Ile | c.628G>A   | missense        | 80 | 0.02834    |
| 6 | 32782105 | .           | A | G | p.Val212Ala | c.635T>C   | missense        | 0  | 0.00004309 |
| 6 | 32781524 | rs148095098 | C | T | p.Val244Ile | c.730G>A   | missense        | 25 | 0.03823    |
| 6 | 32783025 | .           | C | G | p.Val53Leu  | c.157G>C   | missense        | 0  | 0.00008237 |
| 6 | 32782096 | .           | C | A |             | c.643+1G>T | splice donor    | 0  | 0.00008648 |
| 6 | 32781030 | .           | T | C |             | c.787-2A>G | splice acceptor | 0  | 0.000086   |
| 6 | 32783091 | .           | C | T |             | c.92-1G>A  | splice acceptor | 0  | 0.00008256 |

All single nucleotide variants found in human HLA-DOB from ExAC. <http://exac.broadinstitute.org/gene/ENSG00000241106>.

Ref, DOB\*0101 common allele. RSID, SNP. Highlighted, alleles used in Figures 6 and S3).
