# Supplementary material
Source: PubMed Central journal article supplement (PMC5568092)
Supplement: NIHMS895029-supplement-5.pdf [file NIHMS895029-supplement-5.pdf]

**Supplemental Table 5. DOA alleles. Related to Figures 6 and 7.**

| Chrom | Position | RSID        | Ref | Alt | Protein Consequence | Transcript Consequence | Annotation   | Number of Homozygotes | Allele Frequency |
|-------|----------|-------------|-----|-----|---------------------|------------------------|--------------|-----------------------|------------------|
| 6     | 32975808 | rs11575906  | G   | A   | p.Arg105Cys         | c.313C>T               | missense     | 23                    | 0.01242          |
| 6     | 32977298 | rs144931749 | C   | T   | p.Gly6Arg           | c.16G>A                | missense     | 19                    | 0.008975         |
| 6     | 32975286 | rs34987694  | A   | G   | p.Phe139Leu         | c.415T>C               | missense     | 7                     | 0.004471         |
| 6     | 32974914 | rs141887419 | C   | A   | p.Gly231Val         | c.692G>T               | missense     | 0                     | 0.001788         |
| 6     | 32975885 | rs148303384 | C   | T   | p.Arg79His          | c.236G>A               | missense     | 1                     | 0.001655         |
| 6     | 32974897 | rs114742371 | C   | T   | p.Val237Ile         | c.709G>A               | missense     | 0                     | 0.0007655        |
| 6     | 32975177 | rs150939187 | T   | C   | p.His175Arg         | c.524A>G               | missense     | 0                     | 0.0006018        |
| 6     | 32974966 | rs144962928 | C   | T   | p.Asp214Asn         | c.640G>A               | missense     | 0                     | 0.000554         |
| 6     | 32976012 | rs41541116  | CG  | C   | p.Ala37ProfsTer26   | c.108delC              | frameshift   | 0                     | 0.0003387        |
| 6     | 32975163 | rs142562508 | C   | T   | p.Val180Met         | c.538G>A               | missense     | 0                     | 0.0002033        |
| 6     | 32975945 | .           | G   | A   | p.Ser59Phe          | c.176C>T               | missense     | 0                     | 0.0001465        |
| 6     | 32974980 | rs147947959 | G   | A   | p.Pro209Leu         | c.626C>T               | missense     | 0                     | 0.00008402       |
| 6     | 32975284 | .           | G   | T   | p.Phe139Leu         | c.417C>A               | missense     | 0                     | 0.0000777        |
| 6     | 32975187 | .           | G   | A   | p.Arg172Cys         | c.514C>T               | missense     | 0                     | 0.00007089       |
| 6     | 32975250 | .           | C   | G   | p.Gly151Arg         | c.451G>C               | missense     | 0                     | 0.00006983       |
| 6     | 32977258 | .           | C   | T   | p.Ser19Asn          | c.56G>A                | missense     | 0                     | 0.00005399       |
| 6     | 32975352 | .           | C   | T   | p.Val117Met         | c.349G>A               | missense     | 0                     | 0.00005237       |
| 6     | 32975255 | .           | C   | T   | p.Arg149His         | c.446G>A               | missense     | 0                     | 0.00005225       |
| 6     | 32975319 | .           | G   | T   | p.Pro128Thr         | c.382C>A               | missense     | 0                     | 0.00005187       |
| 6     | 32975845 | .           | G   | C   | p.Ile92Met          | c.276C>G               | missense     | 0                     | 0.0000431        |
| 6     | 32975874 | .           | G   | A   | p.Gln83Ter          | c.247C>T               | stop gained  | 0                     | 0.00004309       |
| 6     | 32975151 | .           | C   | T   | p.Glu184Lys         | c.550G>A               | missense     | 0                     | 0.0000352        |
| 6     | 32975337 | .           | G   | A   | p.Arg122Trp         | c.364C>T               | missense     | 0                     | 0.00003474       |
| 6     | 32974906 | .           | C   | T   | p.Val234Met         | c.700G>A               | missense     | 0                     | 0.00003359       |
| 6     | 32975207 | .           | G   | A   | p.Ser165Phe         | c.494C>T               | missense     | 0                     | 0.00002651       |
| 6     | 32975360 | .           | C   | T   | p.Arg114Gln         | c.341G>A               | missense     | 0                     | 0.00002628       |
| 6     | 32975336 | .           | C   | T   | p.Arg122Gln         | c.365G>A               | missense     | 0                     | 0.00002602       |
| 6     | 32975994 | rs139861642 | C   | T   | p.Gly43Ser          | c.127G>A               | missense     | 0                     | 0.00002599       |
| 6     | 32975315 | .           | T   | C   | p.Asn129Ser         | c.386A>G               | missense     | 0                     | 0.00002592       |
| 6     | 32975934 | .           | T   | C   | p.Lys63Glu          | c.187A>G               | missense     | 0                     | 0.00002585       |
| 6     | 32974883 | rs142612904 | C   | T   | p.Met241Ile         | c.723G>A               | missense     | 0                     | 0.00002532       |
| 6     | 32977230 | .           | A   | T   |                     | c.82+2T>A              | splice donor | 0                     | 0.00001935       |
| 6     | 32975196 | .           | G   | A   | p.His169Tyr         | c.505C>T               | missense     | 0                     | 0.0000177        |
| 6     | 32975145 | .           | C   | T   | p.Val186Ile         | c.556G>A               | missense     | 0                     | 0.00001757       |
| 6     | 32975232 | .           | C   | T   | p.Gly157Arg         | c.469G>A               | missense     | 0                     | 0.00001756       |
| 6     | 32975144 | .           | A   | G   | p.Val186Ala         | c.557T>C               | missense     | 0                     | 0.00001755       |
| 6     | 32976024 | .           | A   | G   | p.Ser33Pro          | c.97T>C                | missense     | 0                     | 0.0000174        |
| 6     | 32976012 | rs41541116  | C   | A   | p.Ala37Ser          | c.109G>T               | missense     | 0                     | 0.00001737       |
| 6     | 32975264 | .           | G   | T   | p.Thr146Asn         | c.437C>A               | missense     | 0                     | 0.00001729       |

|   |          |             |         |   |                   |                |             |   |             |
|---|----------|-------------|---------|---|-------------------|----------------|-------------|---|-------------|
| 6 | 32975278 | .           | AG      | A | p.Pro141LeufsTer2 | c.422delC      | frameshift  | 0 | 0.00001727  |
| 6 | 32975280 | .           | G       | C | p.Pro141Ala       | c.421C>G       | missense    | 0 | 0.00001727  |
| 6 | 32975298 | .           | C       | T | p.Val135Met       | c.403G>A       | missense    | 0 | 0.00001727  |
| 6 | 32975850 | .           | C       | A | p.Ala91Ser        | c.271G>T       | missense    | 0 | 0.00001724  |
| 6 | 32975958 | rs140147098 | C       | T | p.Glu55Lys        | c.163G>A       | missense    | 0 | 0.00001724  |
| 6 | 32975931 | .           | T       | C | p.Lys64Glu        | c.190A>G       | missense    | 0 | 0.00001723  |
| 6 | 32977310 | .           | C       | T | p.Ala2Thr         | c.4G>A         | missense    | 0 | 0.00001345  |
| 6 | 32977311 | .           | C       | T | p.Met1?           | c.3G>A         | start lost  | 0 | 0.00001344  |
| 6 | 32977309 | .           | G       | T | p.Ala2Asp         | c.5C>A         | missense    | 0 | 0.00001336  |
| 6 | 32977276 | .           | G       | T | p.Thr13Asn        | c.38C>A        | missense    | 0 | 0.00001252  |
| 6 | 32975186 | .           | C       | T | p.Arg172His       | c.515G>A       | missense    | 0 | 0.000008875 |
| 6 | 32975175 | .           | A       | G | p.Tyr176His       | c.526T>C       | missense    | 0 | 0.000008849 |
| 6 | 32975222 | .           | T       | C | p.Gln160Arg       | c.479A>G       | missense    | 0 | 0.000008802 |
| 6 | 32975223 | .           | G       | A | p.Gln160Ter       | c.478C>T       | stop gained | 0 | 0.000008802 |
| 6 | 32975790 | .           | C       | G | p.Val111Leu       | c.331G>C       | missense    | 0 | 0.000008797 |
| 6 | 32975369 | .           | A       | T | p.Val111Glu       | c.332T>A       | missense    | 0 | 0.000008794 |
| 6 | 32975148 | .           | C       | T | p.Asp185Asn       | c.553G>A       | missense    | 0 | 0.000008787 |
| 6 | 32975364 | .           | G       | T | p.Pro113Thr       | c.337C>A       | missense    | 0 | 0.00000878  |
| 6 | 32975142 | rs145505686 | A       | G | p.Tyr187His       | c.559T>C       | missense    | 0 | 0.000008769 |
| 6 | 32975141 | .           | T       | C | p.Tyr187Cys       | c.560A>G       | missense    | 0 | 0.000008765 |
| 6 | 32975237 | .           | G       | C | p.Thr155Ser       | c.464C>G       | missense    | 0 | 0.000008761 |
| 6 | 32975361 | .           | G       | A | p.Arg114Trp       | c.340C>T       | missense    | 0 | 0.000008757 |
| 6 | 32976038 | .           | G       | C | p.Ala28Gly        | c.83C>G        | missense    | 0 | 0.000008737 |
| 6 | 32975250 | .           | C       | T | p.Gly151Ser       | c.451G>A       | missense    | 0 | 0.000008728 |
| 6 | 32975124 | .           | G       | T | p.His193Asn       | c.577C>A       | missense    | 0 | 0.000008723 |
| 6 | 32976030 | .           | T       | C | p.Met31Val        | c.91A>G        | missense    | 0 | 0.000008715 |
| 6 | 32975120 | .           | C       | T | p.Trp194Ter       | c.581G>A       | stop gained | 0 | 0.000008713 |
| 6 | 32975800 | .           | T       | A | p.Arg107Ser       | c.321A>T       | missense    | 0 | 0.000008708 |
| 6 | 32975256 | .           | G       | A | p.Arg149Cys       | c.445C>T       | missense    | 0 | 0.000008703 |
| 6 | 32976018 | .           | C       | T | p.Gly35Arg        | c.103G>A       | missense    | 0 | 0.000008694 |
| 6 | 32975108 | .           | G       | A | p.Ala198Val       | c.593C>T       | missense    | 0 | 0.000008684 |
| 6 | 32975807 | .           | C       | T | p.Arg105His       | c.314G>A       | missense    | 0 | 0.000008673 |
| 6 | 32975099 | .           | A       | G | p.Leu201Pro       | c.602T>C       | missense    | 0 | 0.000008657 |
| 6 | 32975986 | .           | CG<br>A | C | p.Ser45GlyfsTer6  | c.133_134delTC | frameshift  | 0 | 0.000008654 |
| 6 | 32975987 | .           | G       | C | p.Ser45Trp        | c.134C>G       | missense    | 0 | 0.000008654 |
| 6 | 32975985 | .           | C       | G | p.Gly46Arg        | c.136G>C       | missense    | 0 | 0.000008653 |
| 6 | 32975260 | .           | C       | T | p.Trp147Ter       | c.441G>A       | stop gained | 0 | 0.00000865  |
| 6 | 32975320 | .           | C       | A | p.Gln127His       | c.381G>T       | missense    | 0 | 0.000008646 |
| 6 | 32975320 | .           | C       | G | p.Gln127His       | c.381G>C       | missense    | 0 | 0.000008646 |
| 6 | 32975980 | rs145654970 | C       | A | p.Gln47His        | c.141G>T       | missense    | 0 | 0.000008645 |
| 6 | 32975318 | .           | G       | A | p.Pro128Leu       | c.383C>T       | missense    | 0 | 0.000008643 |
| 6 | 32975978 | .           | A       | G | p.Phe48Ser        | c.143T>C       | missense    | 0 | 0.000008642 |
| 6 | 32975817 | .           | G       | A | p.Arg102Cys       | c.304C>T       | missense    | 0 | 0.00000864  |
| 6 | 32975091 | .           | A       | G | p.Trp204Arg       | c.610T>C       | missense    | 0 | 0.000008635 |

|   |          |             |     |   |                    |                |             |   |             |
|---|----------|-------------|-----|---|--------------------|----------------|-------------|---|-------------|
| 6 | 32975279 | rs115076830 | G   | A | p.Pro141Leu        | c.422C>T       | missense    | 0 | 0.000008635 |
| 6 | 32975280 | .           | G   | T | p.Pro141Thr        | c.421C>A       | missense    | 0 | 0.000008634 |
| 6 | 32975302 | .           | G   | T | p.Cys133Ter        | c.399C>A       | stop gained | 0 | 0.000008632 |
| 6 | 32975286 | rs34987694  | A   | T | p.Phe139Ile        | c.415T>A       | missense    | 0 | 0.000008631 |
| 6 | 32975970 | .           | C   | G | p.Glu51Gln         | c.151G>C       | missense    | 0 | 0.000008631 |
| 6 | 32975823 | .           | C   | G | p.Val100Leu        | c.298G>C       | missense    | 0 | 0.00000863  |
| 6 | 32975825 | .           | A   | G | p.Leu99Pro         | c.296T>C       | missense    | 0 | 0.000008627 |
| 6 | 32975859 | .           | C   | G | p.Gly88Arg         | c.262G>C       | missense    | 0 | 0.00000862  |
| 6 | 32975886 | .           | G   | A | p.Arg79Cys         | c.235C>T       | missense    | 0 | 0.000008618 |
| 6 | 32975895 | .           | C   | T | p.Asp76Asn         | c.226G>A       | missense    | 0 | 0.000008616 |
| 6 | 32975913 | .           | G   | A | p.Arg70Cys         | c.208C>T       | missense    | 0 | 0.000008616 |
| 6 | 32975897 | .           | C   | G | p.Gly75Ala         | c.224G>C       | missense    | 0 | 0.000008615 |
| 6 | 32975897 | .           | C   | T | p.Gly75Asp         | c.224G>A       | missense    | 0 | 0.000008615 |
| 6 | 32975912 | .           | C   | G | p.Arg70Pro         | c.209G>C       | missense    | 0 | 0.000008615 |
| 6 | 32975914 | .           | C   | T | p.Trp69Ter         | c.207G>A       | stop gained | 0 | 0.000008615 |
| 6 | 32975927 | .           | C   | G | p.Ser65Thr         | c.194G>C       | missense    | 0 | 0.000008615 |
| 6 | 32974857 | .           | C   | G | p.Arg250Thr        | c.749G>C       | missense    | 0 | 0.000008604 |
| 6 | 32974873 | .           | C   | T | p.Val245Met        | c.733G>A       | missense    | 0 | 0.000008486 |
| 6 | 32974873 | .           | CAT | C | p.Tyr244CysfsTer43 | c.731_732delAT | frameshift  | 0 | 0.000008486 |
| 6 | 32974887 | .           | A   | G | p.Ile240Thr        | c.719T>C       | missense    | 0 | 0.000008427 |
| 6 | 32974891 | .           | T   | C | p.Ile239Val        | c.715A>G       | missense    | 0 | 0.000008418 |
| 6 | 32974986 | .           | T   | A | p.Gln207Leu        | c.620A>T       | missense    | 0 | 0.000008406 |
| 6 | 32974985 | .           | C   | A | p.Gln207His        | c.621G>T       | missense    | 0 | 0.000008405 |
| 6 | 32974978 | .           | T   | C | p.Ile210Val        | c.628A>G       | missense    | 0 | 0.000008399 |
| 6 | 32974963 | .           | C   | A | p.Ala215Ser        | c.643G>T       | missense    | 0 | 0.000008394 |
| 6 | 32974954 | .           | T   | A | p.Thr218Ser        | c.652A>T       | missense    | 0 | 0.000008392 |

All single nucleotide variants found in human HLA-DOA from ExAC. <http://exac.broadinstitute.org/gene/ENSG00000204252>.  
Ref, DOA\*0101 common allele. RSID, SNP.
